# Supplementary material for: Combination of Docking-Based and Pharmacophore-Based Virtual Screening Identifies Novel Agonists That Target the Urotensin Receptor
Source: MDPI journal article supplement (doi:10.3390/molecules27248692), 2022-12-08
Supplement: s1 [file s1]

**Table S1.** 196 ligands targeting UT receptor collected for the construction of the benchmarking dataset.

| No. | ChEMBL ID     | Activity | Activity Parameter | Activity Value(nM) |
|-----|---------------|----------|--------------------|--------------------|
| 1   | CHEMBL437430  | agonist  | EC <sub>50</sub>   | 1.09               |
| 2   | CHEMBL2372899 | agonist  | EC <sub>50</sub>   | 1.80               |
| 3   | CHEMBL53181   | agonist  | EC <sub>50</sub>   | 1.80               |
| 4   | CHEMBL385616  | agonist  | EC <sub>50</sub>   | 1.80               |
| 5   | CHEMBL2372897 | agonist  | EC <sub>50</sub>   | 1.90               |
| 6   | CHEMBL298803  | agonist  | EC <sub>50</sub>   | 2.30               |
| 7   | CHEMBL427632  | agonist  | EC <sub>50</sub>   | 2.40               |
| 8   | CHEMBL408106  | agonist  | EC <sub>50</sub>   | 2.50               |
| 9   | CHEMBL2372896 | agonist  | EC <sub>50</sub>   | 2.70               |
| 10  | CHEMBL414256  | agonist  | EC <sub>50</sub>   | 3.00               |
| 11  | CHEMBL2372907 | agonist  | EC <sub>50</sub>   | 3.20               |
| 12  | CHEMBL2372902 | agonist  | EC <sub>50</sub>   | 3.30               |
| 13  | CHEMBL1627325 | agonist  | EC <sub>50</sub>   | 3.47               |
| 14  | CHEMBL216349  | agonist  | EC <sub>50</sub>   | 3.60               |
| 15  | CHEMBL385962  | agonist  | EC <sub>50</sub>   | 3.80               |
| 16  | CHEMBL4100932 | agonist  | EC <sub>50</sub>   | 4.17               |
| 17  | CHEMBL4066696 | agonist  | EC <sub>50</sub>   | 5.01               |
| 18  | CHEMBL2372901 | agonist  | EC <sub>50</sub>   | 5.70               |
| 19  | CHEMBL192359  | agonist  | EC <sub>50</sub>   | 5.95               |
| 20  | CHEMBL4076150 | agonist  | EC <sub>50</sub>   | 6.17               |
| 21  | CHEMBL607809  | agonist  | EC <sub>50</sub>   | 6.94               |
| 22  | CHEMBL4071437 | agonist  | EC <sub>50</sub>   | 7.08               |
| 23  | CHEMBL593612  | agonist  | EC <sub>50</sub>   | 8.51               |
| 24  | CHEMBL4071437 | agonist  | EC <sub>50</sub>   | 8.51               |
| 25  | CHEMBL593663  | agonist  | EC <sub>50</sub>   | 10.07              |
| 26  | CHEMBL4076150 | agonist  | EC <sub>50</sub>   | 10.72              |
| 27  | CHEMBL4066696 | agonist  | EC <sub>50</sub>   | 10.96              |

|    |               |         |                  |        |
|----|---------------|---------|------------------|--------|
| 28 | CHEMBL607810  | agonist | EC <sub>50</sub> | 12.58  |
| 29 | CHEMBL607811  | agonist | EC <sub>50</sub> | 13.20  |
| 30 | CHEMBL4100932 | agonist | EC <sub>50</sub> | 14.45  |
| 31 | CHEMBL4208184 | agonist | EC <sub>50</sub> | 15.14  |
| 32 | CHEMBL608099  | agonist | EC <sub>50</sub> | 16.72  |
| 33 | CHEMBL608098  | agonist | EC <sub>50</sub> | 20.55  |
| 34 | CHEMBL573392  | agonist | EC <sub>50</sub> | 22.91  |
| 35 | CHEMBL207823  | agonist | EC <sub>50</sub> | 32.36  |
| 36 | CHEMBL573857  | agonist | EC <sub>50</sub> | 32.36  |
| 37 | CHEMBL572439  | agonist | EC <sub>50</sub> | 43.65  |
| 38 | CHEMBL1171808 | agonist | EC <sub>50</sub> | 51.29  |
| 39 | CHEMBL412753  | agonist | EC <sub>50</sub> | 53.00  |
| 40 | CHEMBL203626  | agonist | EC <sub>50</sub> | 66.07  |
| 41 | CHEMBL573569  | agonist | EC <sub>50</sub> | 74.13  |
| 42 | CHEMBL608097  | agonist | EC <sub>50</sub> | 75.66  |
| 43 | CHEMBL572882  | agonist | EC <sub>50</sub> | 75.86  |
| 44 | CHEMBL583981  | agonist | EC <sub>50</sub> | 77.62  |
| 45 | CHEMBL204988  | agonist | EC <sub>50</sub> | 77.62  |
| 46 | CHEMBL204989  | agonist | EC <sub>50</sub> | 77.62  |
| 47 | CHEMBL578654  | agonist | EC <sub>50</sub> | 104.71 |
| 48 | CHEMBL383698  | agonist | EC <sub>50</sub> | 109.65 |
| 49 | CHEMBL4100932 | agonist | EC <sub>50</sub> | 117.49 |
| 50 | CHEMBL425592  | agonist | EC <sub>50</sub> | 117.49 |
| 51 | CHEMBL574527  | agonist | EC <sub>50</sub> | 120.23 |
| 52 | CHEMBL4208184 | agonist | EC <sub>50</sub> | 120.23 |
| 53 | CHEMBL574527  | agonist | EC <sub>50</sub> | 120.23 |
| 54 | CHEMBL572883  | agonist | EC <sub>50</sub> | 125.89 |
| 55 | CHEMBL228470  | agonist | EC <sub>50</sub> | 128.82 |
| 56 | CHEMBL380346  | agonist | EC <sub>50</sub> | 134.9  |

|    |               |         |                  |        |
|----|---------------|---------|------------------|--------|
| 57 | CHEMBL229713  | agonist | EC <sub>50</sub> | 134.9  |
| 58 | CHEMBL206811  | agonist | EC <sub>50</sub> | 144.54 |
| 59 | CHEMBL1173399 | agonist | EC <sub>50</sub> | 147.91 |
| 60 | CHEMBL383326  | agonist | EC <sub>50</sub> | 190.55 |
| 61 | CHEMBL4205274 | agonist | EC <sub>50</sub> | 190.55 |
| 62 | CHEMBL2372903 | agonist | EC <sub>50</sub> | 193.00 |
| 63 | CHEMBL572398  | agonist | EC <sub>50</sub> | 199.53 |
| 64 | CHEMBL2372895 | agonist | EC <sub>50</sub> | 233.00 |
| 65 | CHEMBL192359  | agonist | EC <sub>50</sub> | 250.00 |
| 66 | CHEMBL203051  | agonist | EC <sub>50</sub> | 251.19 |
| 67 | CHEMBL535141  | agonist | EC <sub>50</sub> | 251.19 |
| 68 | CHEMBL1172223 | agonist | EC <sub>50</sub> | 263.03 |
| 69 | CHEMBL205681  | agonist | EC <sub>50</sub> | 275.42 |
| 70 | CHEMBL206551  | agonist | EC <sub>50</sub> | 288.4  |
| 71 | CHEMBL192359  | agonist | EC <sub>50</sub> | 300.00 |
| 72 | CHEMBL572391  | agonist | EC <sub>50</sub> | 309.03 |
| 73 | CHEMBL576746  | agonist | EC <sub>50</sub> | 316.23 |
| 74 | CHEMBL535141  | agonist | EC <sub>50</sub> | 316.23 |
| 75 | CHEMBL575629  | agonist | EC <sub>50</sub> | 346.74 |
| 76 | CHEMBL573575  | agonist | EC <sub>50</sub> | 363.08 |
| 77 | CHEMBL229710  | agonist | EC <sub>50</sub> | 371.54 |
| 78 | CHEMBL229714  | agonist | EC <sub>50</sub> | 380.19 |
| 79 | CHEMBL228471  | agonist | EC <sub>50</sub> | 398.11 |
| 80 | CHEMBL207783  | agonist | EC <sub>50</sub> | 407.38 |
| 81 | CHEMBL374817  | agonist | EC <sub>50</sub> | 426.58 |
| 82 | CHEMBL582835  | agonist | EC <sub>50</sub> | 436.52 |
| 83 | CHEMBL229923  | agonist | EC <sub>50</sub> | 436.52 |
| 84 | CHEMBL229764  | agonist | EC <sub>50</sub> | 457.09 |
| 85 | CHEMBL573640  | agonist | EC <sub>50</sub> | 457.09 |

|     |               |            |                  |          |
|-----|---------------|------------|------------------|----------|
| 86  | CHEMBL206832  | agonist    | EC <sub>50</sub> | 467.74   |
| 87  | CHEMBL1173172 | agonist    | EC <sub>50</sub> | 501.19   |
| 88  | CHEMBL387661  | agonist    | EC <sub>50</sub> | 512.86   |
| 89  | CHEMBL205991  | agonist    | EC <sub>50</sub> | 524.81   |
| 90  | CHEMBL203937  | agonist    | EC <sub>50</sub> | 524.81   |
| 91  | CHEMBL578853  | agonist    | EC <sub>50</sub> | 524.81   |
| 92  | CHEMBL575819  | agonist    | EC <sub>50</sub> | 537.03   |
| 93  | CHEMBL390792  | agonist    | EC <sub>50</sub> | 575.44   |
| 94  | CHEMBL387694  | agonist    | EC <sub>50</sub> | 588.84   |
| 95  | CHEMBL229709  | agonist    | EC <sub>50</sub> | 602.56   |
| 96  | CHEMBL573574  | agonist    | EC <sub>50</sub> | 645.65   |
| 97  | CHEMBL574731  | agonist    | EC <sub>50</sub> | 645.65   |
| 98  | CHEMBL572467  | agonist    | EC <sub>50</sub> | 660.69   |
| 99  | CHEMBL1172763 | agonist    | EC <sub>50</sub> | 676.08   |
| 100 | CHEMBL1173492 | agonist    | EC <sub>50</sub> | 691.83   |
| 101 | CHEMBL1173081 | agonist    | EC <sub>50</sub> | 724.44   |
| 102 | CHEMBL572454  | agonist    | EC <sub>50</sub> | 741.31   |
| 103 | CHEMBL575630  | agonist    | EC <sub>50</sub> | 812.83   |
| 104 | CHEMBL572392  | agonist    | EC <sub>50</sub> | 812.83   |
| 105 | CHEMBL3104642 | antagonist | IC <sub>50</sub> | 0.000001 |
| 106 | CHEMBL3104468 | antagonist | IC <sub>50</sub> | 0.00001  |
| 107 | CHEMBL3104466 | antagonist | IC <sub>50</sub> | 0.0001   |
| 108 | CHEMBL1164032 | antagonist | IC <sub>50</sub> | 3.60     |
| 109 | CHEMBL495075  | antagonist | IC <sub>50</sub> | 4.00     |
| 110 | CHEMBL567303  | antagonist | IC <sub>50</sub> | 5.00     |
| 111 | CHEMBL522770  | antagonist | IC <sub>50</sub> | 6.00     |
| 112 | CHEMBL567713  | antagonist | IC <sub>50</sub> | 8.00     |
| 113 | CHEMBL522770  | antagonist | IC <sub>50</sub> | 8.00     |
| 114 | CHEMBL3104644 | antagonist | IC <sub>50</sub> | 9.00     |

|     |               |            |                  |       |
|-----|---------------|------------|------------------|-------|
| 115 | CHEMBL3104464 | antagonist | IC <sub>50</sub> | 10.00 |
| 116 | CHEMBL3104471 | antagonist | IC <sub>50</sub> | 12.00 |
| 117 | CHEMBL3104637 | antagonist | IC <sub>50</sub> | 16.98 |
| 118 | CHEMBL3358682 | antagonist | IC <sub>50</sub> | 20.00 |
| 119 | CHEMBL3358685 | antagonist | IC <sub>50</sub> | 20.00 |
| 120 | CHEMBL3104465 | antagonist | IC <sub>50</sub> | 21.00 |
| 121 | CHEMBL3977330 | antagonist | IC <sub>50</sub> | 25.00 |
| 122 | CHEMBL3358679 | antagonist | IC <sub>50</sub> | 26.00 |
| 123 | CHEMBL3104463 | antagonist | IC <sub>50</sub> | 27.54 |
| 124 | CHEMBL3104462 | antagonist | IC <sub>50</sub> | 29.51 |
| 125 | CHEMBL2348502 | antagonist | IC <sub>50</sub> | 34.00 |
| 126 | CHEMBL3358686 | antagonist | IC <sub>50</sub> | 42.00 |
| 127 | CHEMBL2348501 | antagonist | IC <sub>50</sub> | 43.00 |
| 128 | CHEMBL3104638 | antagonist | IC <sub>50</sub> | 46.00 |
| 129 | CHEMBL567759  | antagonist | IC <sub>50</sub> | 47.00 |
| 130 | CHEMBL578207  | antagonist | IC <sub>50</sub> | 51.00 |
| 131 | CHEMBL3896625 | antagonist | IC <sub>50</sub> | 51.00 |
| 132 | CHEMBL568637  | antagonist | IC <sub>50</sub> | 53.00 |
| 133 | CHEMBL3924660 | antagonist | IC <sub>50</sub> | 53.00 |
| 134 | CHEMBL3104639 | antagonist | IC <sub>50</sub> | 58.00 |
| 135 | CHEMBL568123  | antagonist | IC <sub>50</sub> | 59.00 |
| 136 | CHEMBL3104461 | antagonist | IC <sub>50</sub> | 60.00 |
| 137 | CHEMBL3358680 | antagonist | IC <sub>50</sub> | 60.00 |
| 138 | CHEMBL1163360 | antagonist | IC <sub>50</sub> | 67.00 |
| 139 | CHEMBL3968841 | antagonist | IC <sub>50</sub> | 74.00 |
| 140 | CHEMBL3358674 | antagonist | IC <sub>50</sub> | 78.00 |
| 141 | CHEMBL3915670 | antagonist | IC <sub>50</sub> | 86.00 |
| 142 | CHEMBL3987058 | antagonist | IC <sub>50</sub> | 87.00 |
| 143 | CHEMBL571535  | antagonist | IC <sub>50</sub> | 88.00 |

|     |               |            |                  |        |
|-----|---------------|------------|------------------|--------|
| 144 | CHEMBL3104467 | antagonist | IC <sub>50</sub> | 88.02  |
| 145 | CHEMBL3906682 | antagonist | IC <sub>50</sub> | 100.00 |
| 146 | CHEMBL2348523 | antagonist | IC <sub>50</sub> | 100.00 |
| 147 | CHEMBL3957806 | antagonist | IC <sub>50</sub> | 100.00 |
| 148 | CHEMBL2348524 | antagonist | IC <sub>50</sub> | 120.00 |
| 149 | CHEMBL3979822 | antagonist | IC <sub>50</sub> | 130.00 |
| 150 | CHEMBL567075  | antagonist | IC <sub>50</sub> | 140.00 |
| 151 | CHEMBL3358683 | antagonist | IC <sub>50</sub> | 140.00 |
| 152 | CHEMBL3898238 | antagonist | IC <sub>50</sub> | 140.00 |
| 153 | CHEMBL3907266 | antagonist | IC <sub>50</sub> | 140.00 |
| 154 | CHEMBL567736  | antagonist | IC <sub>50</sub> | 150.00 |
| 155 | CHEMBL566433  | antagonist | IC <sub>50</sub> | 150.00 |
| 156 | CHEMBL3358667 | antagonist | IC <sub>50</sub> | 160.00 |
| 157 | CHEMBL366221  | antagonist | IC <sub>50</sub> | 170.00 |
| 158 | CHEMBL2348522 | antagonist | IC <sub>50</sub> | 180.00 |
| 159 | CHEMBL3104640 | antagonist | IC <sub>50</sub> | 181.00 |
| 160 | CHEMBL3358684 | antagonist | IC <sub>50</sub> | 190.00 |
| 161 | CHEMBL2348511 | antagonist | IC <sub>50</sub> | 191.00 |
| 162 | CHEMBL567949  | antagonist | IC <sub>50</sub> | 220.00 |
| 163 | CHEMBL568165  | antagonist | IC <sub>50</sub> | 240.00 |
| 164 | CHEMBL2348504 | antagonist | IC <sub>50</sub> | 245.00 |
| 165 | CHEMBL565580  | antagonist | IC <sub>50</sub> | 260.00 |
| 166 | CHEMBL3104643 | antagonist | IC <sub>50</sub> | 277.00 |
| 167 | CHEMBL3949719 | antagonist | IC <sub>50</sub> | 310.00 |
| 168 | CHEMBL567303  | antagonist | IC <sub>50</sub> | 320.00 |
| 169 | CHEMBL2348528 | antagonist | IC <sub>50</sub> | 350.00 |
| 170 | CHEMBL3104459 | antagonist | IC <sub>50</sub> | 361.00 |
| 171 | CHEMBL3104459 | antagonist | IC <sub>50</sub> | 363.08 |
| 172 | CHEMBL565416  | antagonist | IC <sub>50</sub> | 410.00 |

|     |               |            |                  |        |
|-----|---------------|------------|------------------|--------|
| 173 | CHEMBL2348505 | antagonist | IC <sub>50</sub> | 440.00 |
| 174 | CHEMBL2348519 | antagonist | IC <sub>50</sub> | 450.00 |
| 175 | CHEMBL3358671 | antagonist | IC <sub>50</sub> | 450.00 |
| 176 | CHEMBL566366  | antagonist | IC <sub>50</sub> | 500.00 |
| 177 | CHEMBL578203  | antagonist | IC <sub>50</sub> | 500.00 |
| 178 | CHEMBL571537  | antagonist | IC <sub>50</sub> | 510.00 |
| 179 | CHEMBL2348515 | antagonist | IC <sub>50</sub> | 520.00 |
| 180 | CHEMBL2348520 | antagonist | IC <sub>50</sub> | 550.00 |
| 181 | CHEMBL3915656 | antagonist | IC <sub>50</sub> | 560.00 |
| 182 | CHEMBL3920751 | antagonist | IC <sub>50</sub> | 610.00 |
| 183 | CHEMBL2348518 | antagonist | IC <sub>50</sub> | 620.00 |
| 184 | CHEMBL254154  | antagonist | IC <sub>50</sub> | 630.96 |
| 185 | CHEMBL2348508 | antagonist | IC <sub>50</sub> | 669.00 |
| 186 | CHEMBL2348517 | antagonist | IC <sub>50</sub> | 691.00 |
| 187 | CHEMBL2348516 | antagonist | IC <sub>50</sub> | 714.00 |
| 188 | CHEMBL2348503 | antagonist | IC <sub>50</sub> | 742.00 |
| 189 | CHEMBL568764  | antagonist | IC <sub>50</sub> | 760.00 |
| 190 | CHEMBL2348515 | antagonist | IC <sub>50</sub> | 765.00 |
| 191 | CHEMBL3942137 | antagonist | IC <sub>50</sub> | 770.00 |
| 192 | CHEMBL2348528 | antagonist | IC <sub>50</sub> | 800.00 |
| 193 | CHEMBL2348514 | antagonist | IC <sub>50</sub> | 821.00 |
| 194 | CHEMBL2348527 | antagonist | IC <sub>50</sub> | 840.00 |
| 195 | CHEMBL3358673 | antagonist | IC <sub>50</sub> | 930.00 |
| 196 | CHEMBL2348519 | antagonist | IC <sub>50</sub> | 950.00 |

---

**Table S2.** Identity of ten templates for single-template modelling and RMSD value of ten homology models.

| Template | Identity (%) | RMSD   |
|----------|--------------|--------|
| 4N6H     | 28.17        | 0.273  |
| 5DHG     | 28.98        | 0.179  |
| 5DHH     | 28.98        | 0.205  |
| 4EJ4     | 27.27        | 3.986  |
| 5NDD     | 22.92        | 2.730  |
| 4DJH     | 27.02        | 29.839 |
| 4RWA     | 28.27        | 0.469  |
| 4RWD     | 28.27        | 0.272  |
| 2RH1     | 24.07        | 29.078 |
| 6G79     | 22.11        | 1.922  |



**Table S3.** Template suggestions and similarity for UT receptor multi-templates modelling.

| Helix | Templates | Helix sequence similarity (%) |
|-------|-----------|-------------------------------|
| TMH1  | 4EJ4      | 43.33                         |
| TMH2  | 4EA3      | 62.96                         |
| TMH3  | 4MBS      | 64.71                         |
| TMH4  | 5NDD      | 58.33                         |
| TMH5  | 2RH1      | 48.28                         |
| TMH6  | 4NTJ      | 46.67                         |
| TMH7  | 5UEN      | 53.85                         |
| H8    | 1U19      | 45.45                         |

**Table S4.** Evaluation results of models constructed based on three different modelling methods by ramachandran plot, overall quality factor, and verify 3D. STM: single-template model; MTM: multi-templates model; TDM: threading model.

| No. | Model  | Ramachandran Plot                             |                                                  |                                                   |                                      | Overall Quality Factor | Verify 3D |
|-----|--------|-----------------------------------------------|--------------------------------------------------|---------------------------------------------------|--------------------------------------|------------------------|-----------|
|     |        | Residue<br>s in<br>most<br>favored<br>regions | Residues<br>in<br>addition<br>allowed<br>regions | Residues<br>in<br>generally<br>allowed<br>regions | Residues in<br>disallowed<br>regions |                        |           |
| 1   | STM-1  | 95.6%                                         | 3.6%                                             | 5.8%                                              | 0.0%                                 | 98.1685                | 62.32%    |
| 2   | STM-2  | 93.5%                                         | 4.5%                                             | 1.2%                                              | 0.8%                                 | 92.1348                | 60.43%    |
| 3   | STM-3  | 95.5%                                         | 4.0%                                             | 0.4%                                              | 0.4%                                 | 97.3684                | 60.5%     |
| 4   | STM-4  | 95.1%                                         | 4.5%                                             | 0.4%                                              | 0.0%                                 | 96.0784                | 51.44%    |
| 5   | STM-5  | 93.2%                                         | 5.6%                                             | 1.2%                                              | 0.0%                                 | 88.3636                | 62.54%    |
| 6   | STM-6  | 94.8%                                         | 4.8%                                             | 0.4%                                              | 0.0%                                 | 93.7269                | 55.83%    |
| 7   | STM-7  | 95.6%                                         | 4.0%                                             | 0.4%                                              | 0.0%                                 | 97.8022                | 71.63%    |
| 8   | STM-8  | 93.9%                                         | 5.7%                                             | 0.0%                                              | 0.4%                                 | 95.0943                | 64.41%    |
| 9   | STM-9  | 94.6%                                         | 5.1%                                             | 0.2%                                              | 0.0%                                 | 95.8673                | 60.41%    |
| 10  | STM-10 | 93.5%                                         | 5.3%                                             | 1.2%                                              | 0.0%                                 | 69.8885                | 44.61%    |
| 11  | MTM-1  | 93.9%                                         | 4.9%                                             | 1.2%                                              | 0.0%                                 | 95.149                 | 63.80%    |
| 12  | TDM-1  | 81.1%                                         | 15.5%                                            | 1.2%                                              | 2.2%                                 | 84.5144                | 58.87%    |
| 13  | TDM -2 | 79.2%                                         | 13.7%                                            | 4.0%                                              | 3.1%                                 | 86.3636                | 60.93%    |
| 14  | TDM -3 | 77.6%                                         | 16.5%                                            | 3.1%                                              | 2.8%                                 | 84.1689                | 64.52%    |
| 15  | TDM -4 | 81.4%                                         | 14.6%                                            | 2.2%                                              | 1.9%                                 | 93.9663                | 62.72%    |
| 16  | TDM -5 | 75.5%                                         | 18.6%                                            | 3.1%                                              | 2.8%                                 | 88.9764                | 50.90%    |

**Table S5.** Docking results of the 11 generated models with active ligands using Libdock module of Discovery studio. STM: single-template model; MTM: multi-templates model; TDM: threading model.

| <b>Model</b> | <b>Conformers generated</b> | <b>Poses docked</b> | <b>Ligands failed to dock</b> |
|--------------|-----------------------------|---------------------|-------------------------------|
| STM-1        | 32513                       | 11584               | 0                             |
| STM-3        | 32513                       | 4327                | 6                             |
| STM-4        | 32513                       | 6983                | 12                            |
| STM-2        | 32513                       | 8947                | 24                            |
| STM-5        | 32513                       | 1976                | 50                            |
| MTM-1        | 32513                       | 596                 | 46                            |
| TDM -1       | 32513                       | 714                 | 40                            |
| TDM -2       | 32513                       | 9914                | 42                            |
| TDM -3       | 32513                       | 11541               | 10                            |
| TDM -4       | 32513                       | 16442               | 0                             |
| TDM -5       | 32513                       | 11427               | 0                             |

**Table S6.** RMSD comparison between different modelling models.

| RMSD    | Model 1 | Model 2 | Model 3 | Model 4 |
|---------|---------|---------|---------|---------|
| Model 1 | 0       | 2.662   | 1.099   | 3.004   |
| Model 2 | 2.662   | 0       | 2.486   | 2.933   |
| Model 3 | 1.099   | 2.486   | 0       | 2.808   |
| Model 4 | 3.004   | 2.933   | 2.808   | 0       |

**Table S7.** ChEMBL ID, two-dimensional structure, and EC<sub>50</sub> of 14 training set molecules.

| Molecule's | Molecule<br>ChEMBL ID | Molecular structure                                                                  | Activity<br>value EC <sub>50</sub><br>(M) |
|------------|-----------------------|--------------------------------------------------------------------------------------|-------------------------------------------|
| Molecule 1 | CHEMBL437430<br>(UII) | 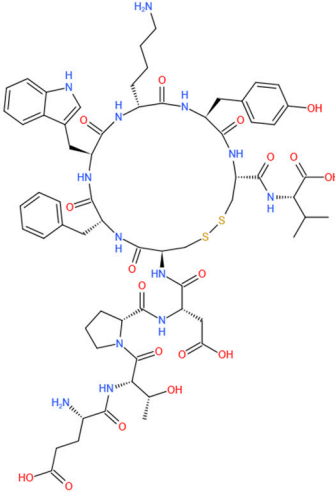   | 1.09*10 <sup>-9</sup>                     |
| Molecule 2 | CHEMBL380346          |    | 1.35*10 <sup>-7</sup>                     |
| Molecule 3 | CHEMBL574304          |  | 8.71*10 <sup>-7</sup>                     |
| Molecule 4 | CHEMBL572467          |  | 6.61*10 <sup>-7</sup>                     |
| Molecule 5 | CHEMBL4071437         |  | 7.08*10 <sup>-8</sup>                     |

|             |               |                                                                                     |                      |
|-------------|---------------|-------------------------------------------------------------------------------------|----------------------|
| Molecule 6  | CHEMBL205991  | 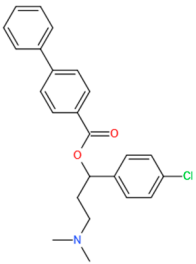  | $5.25 \cdot 10^{-7}$ |
| Molecule 7  | CHEMBL4205274 |   | $1.91 \cdot 10^{-7}$ |
| Molecule 8  | CHEMBL425592  |  | $1.17 \cdot 10^{-7}$ |
| Molecule 9  | CHEMBL192359  |  | $5.95 \cdot 10^{-9}$ |
| Molecule 10 | CHEMBL387694  |  | $5.89 \cdot 10^{-7}$ |

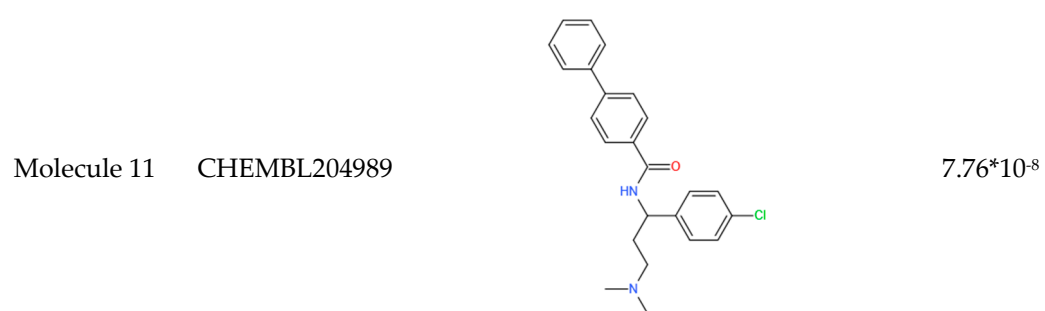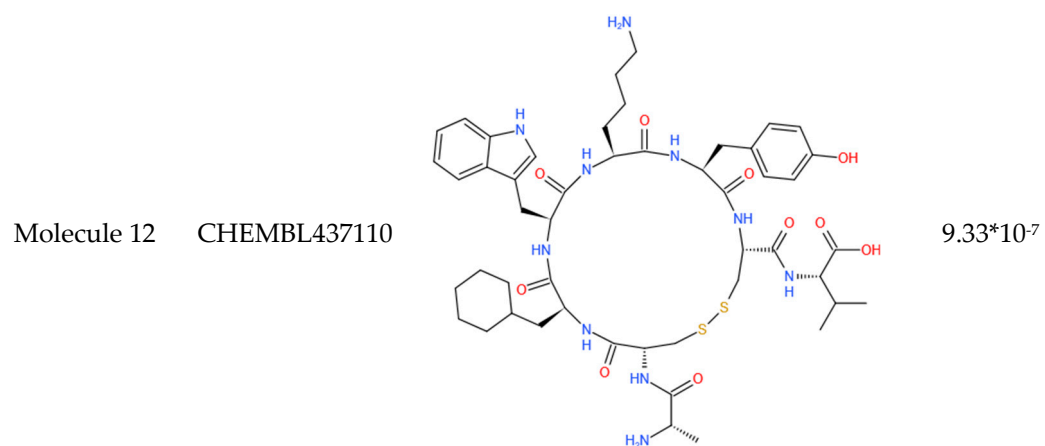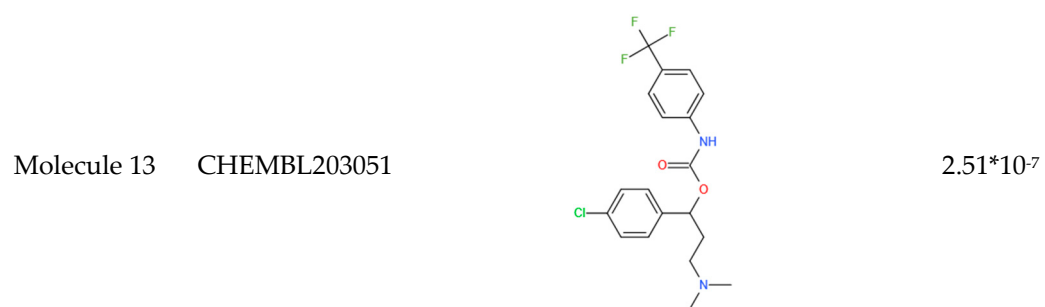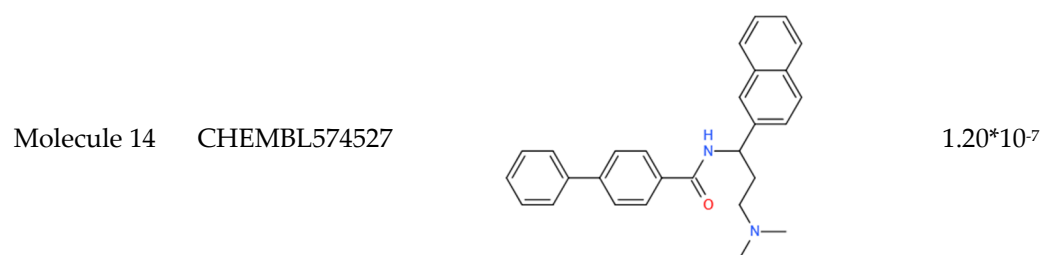

**Table S8.** The parameters of ten common features of pharmacophore.

| Number | Features | Score   |
|--------|----------|---------|
| 1      | HHHA     | 132.321 |
| 2      | HHHA     | 125.364 |
| 3      | HHHA     | 122.702 |
| 4      | HHHA     | 120.363 |
| 5      | HHHA     | 115.667 |
| 6      | HHHA     | 115.200 |
| 7      | HHHA     | 114.628 |
| 8      | HHHA     | 113.562 |
| 9      | HHHA     | 112.886 |
| 10     | HHHA     | 110.690 |

**Table S9.** The ADMET properties of three screened chemical compounds.

| Compound's | Solubility | Absorption level | BBB level | PPB(AlogP98) | CYP2D6 inhibitor | Hepatotoxic Applicability |
|------------|------------|------------------|-----------|--------------|------------------|---------------------------|
| Compound 1 | -5.17      | 1                | 4         | 4.13         | False            | True                      |
| Compound 2 | -3.59      | 0                | 4         | 2.18         | False            | True                      |
| Compound 3 | -4.58      | 0                | 1         | 3.84         | False            | False                     |
