# Supplementary figures and images for: Combination of Docking-Based and Pharmacophore-Based Virtual Screening Identifies Novel Agonists That Target the Urotensin Receptor
Source: MDPI journal article supplement (doi:10.3390/molecules27248692), 2022-12-08

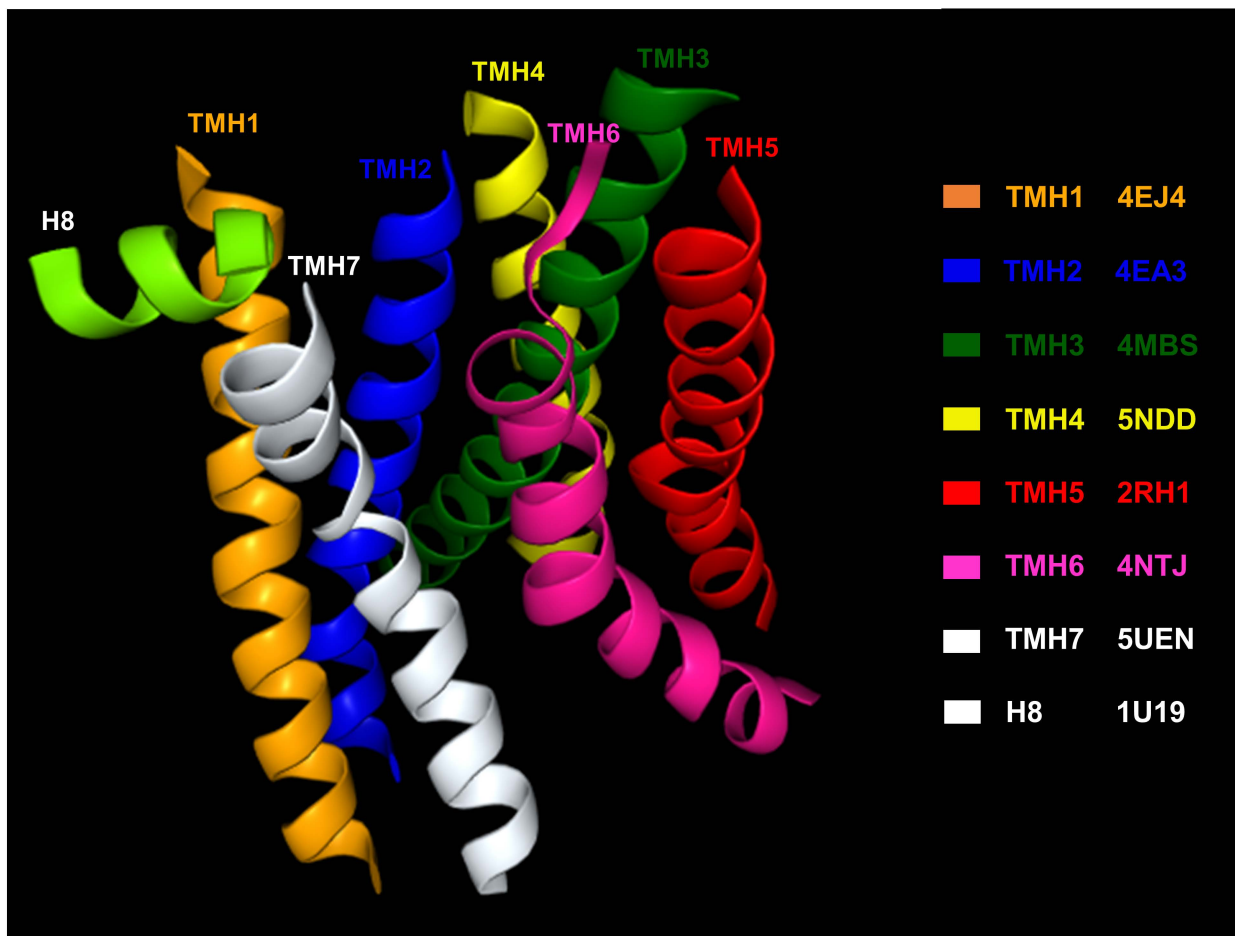

Supplement: s1 [file s1]

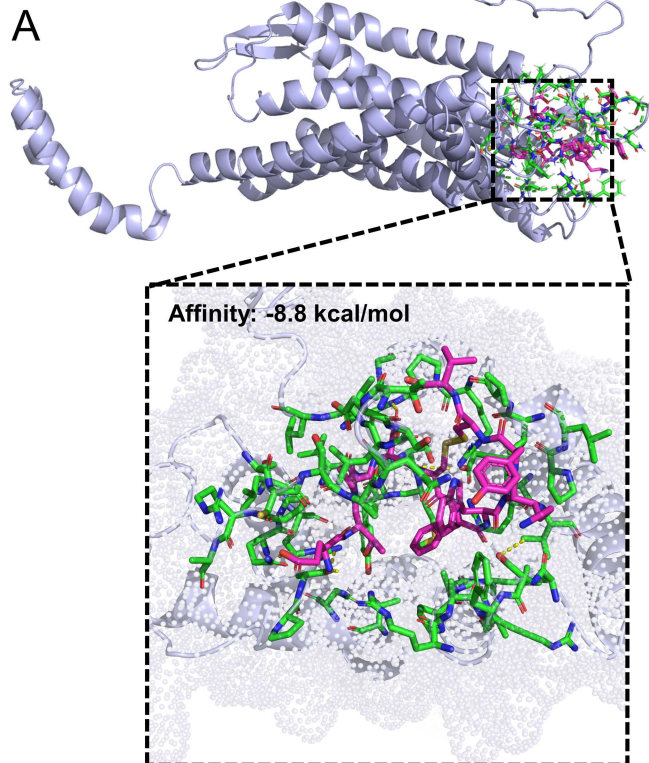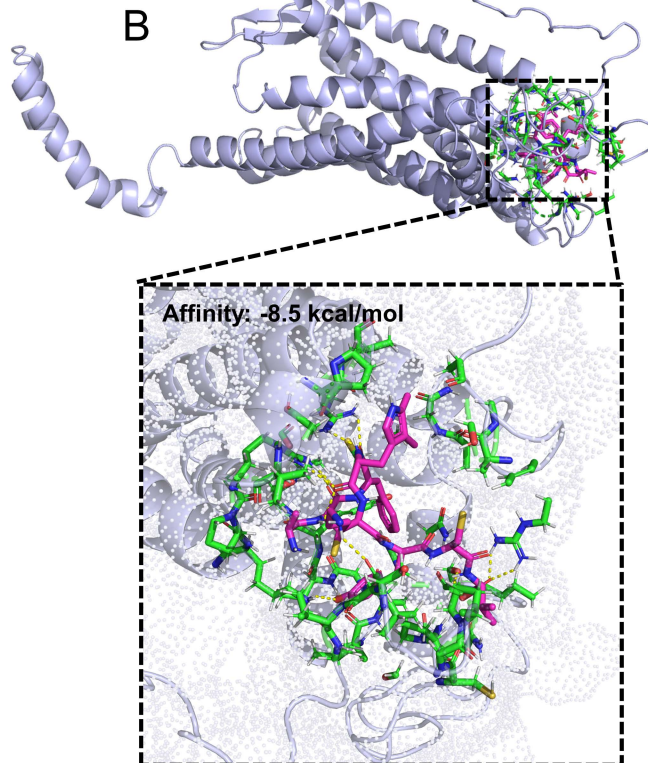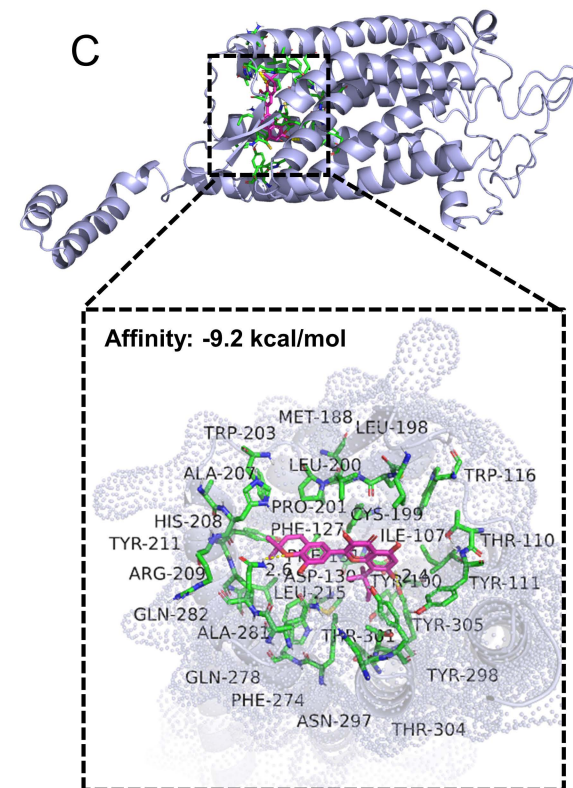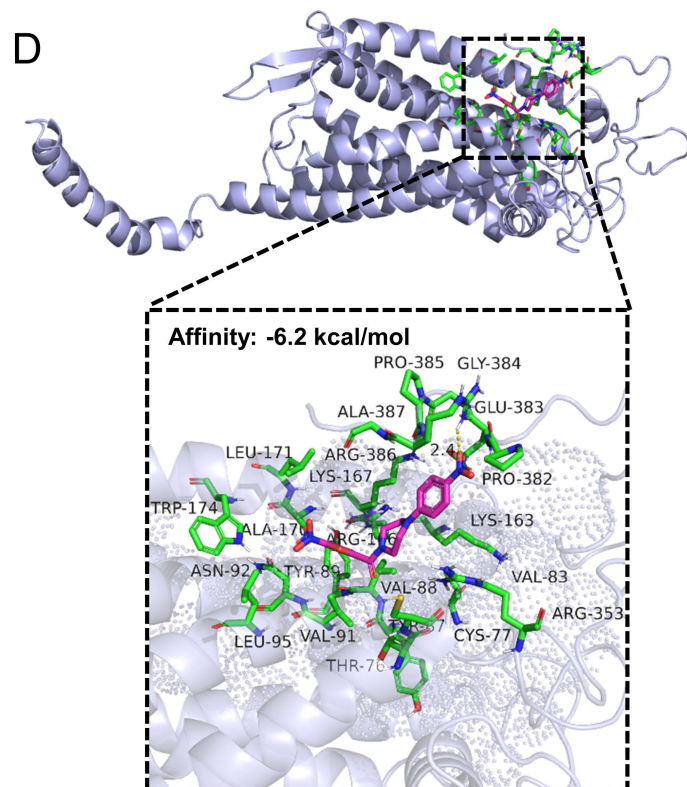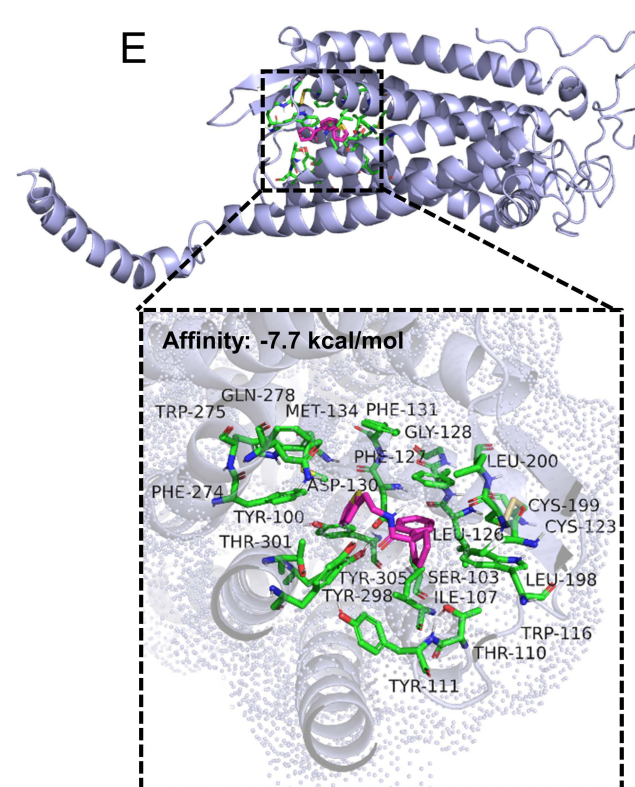

Supplement: s1 [file s1]
